# Supplementary material for: High Somatic Mutation and Neoantigen Burden Do Not Correlate with Decreased Progression-Free Survival in HCC Patients not Undergoing Immunotherapy
Source: PubMed Central journal article supplement (PMC6966682; doi:10.3390/cancers11121824), 2019-11-20
Supplement: cancers-11-01824-s001.pdf [file cancers-11-01824-s001.pdf]

## Supplementary Materials: High Somatic Mutation and Neoantigen Burden do not Correlate with Decreased Progression-Free Survival in HCC Patients not Undergoing Immunotherapy

Angela Mauriello, Roberta Zeuli, Beatrice Cavalluzzo, Annacarmen Petrizzo, Maria Lina Tornesello, Franco M. Buonaguro, Michele Ceccarelli, Maria Tagliamonte and Luigi Buonaguro

**Table S1.** Mutated neoantigens with homology to pathogen derived antigens.

| SAMPLE        | Nr neoAg<br>DAI>10 | Nr neoAg<br>DAI>10 mut<br><50 | Pathogen    | Homologous TCR<br>Binding | Homologous<br>Total |
|---------------|--------------------|-------------------------------|-------------|---------------------------|---------------------|
| TCGA-2Y-A9H1  | 11                 | 2                             | dengue      | 3 aa                      | 5 aa                |
| TCGA-CC-A5UD  | 12                 | 3                             | TAX HTLV II | 3 aa                      | 5 aa                |
| TCGA-DD-A39X  | 5                  | 1                             | malaria     | 3 aa                      | 7 aa                |
| TCGA-DD-A3A4  | 9                  | 1                             | Protein E6  | 2 aa                      | 5 aa                |
| TCGA-DD-AACG  | 7                  | 1                             | HCV         | 2 aa                      | 5 aa                |
| TCGA-DD-AAADF | 19                 | 1                             | HCV         | 3 aa                      | 5 aa                |
| TCGA-DD-AADM  | 10                 | 2                             | HCV         | 3 aa                      | 5 aa                |
| TCGA-FV-A3R2  | 7                  | 1                             | Trip. Cru   | 2 aa                      | 6 aa                |
| TCGA-G3-A7M9  | 11                 | 0                             | M tuber     | 3 aa                      | 5 aa                |
| TCGA-GJ-A6C0  | 8                  | 1                             | HCV         | 2 aa                      | 6 aa                |

**Table S2.** Mutated neoantigens with homology to unrelated self antigens.

| SAMPLE        | NeoAg<br>DAI>10 | NeoAg<br>DAI>10 mut<br><50 | Homologous<br>TCR Binding | Homologous<br>Total |
|---------------|-----------------|----------------------------|---------------------------|---------------------|
| TCGA-2Y-A9H1  | 11              | 2                          | 3 aa                      | 7 aa                |
| TCGA-4R-AA8I  | 47              | 2                          | 3 aa                      | 6 aa                |
| TCGA-BC-A10W  | 8               | 0                          | 3 aa                      | 7 aa                |
| TCGA-CC-5258  | 8               | 1                          | 3 aa                      | 7 aa                |
| TCGA-CC-5264  | 10              | 2                          | 3 aa                      | 6 aa                |
| TCGA-CC-A5UD  | 12              | 3                          | 3 aa                      | 6 aa                |
| TCGA-CC-A8HV  | 12              | 2                          | 3 aa                      | 6 aa                |
| TCGA-DD-A116  | 9               | 3                          | 3 aa                      | 7 aa                |
| TCGA-DD-AACC  | 14              | 2                          | 3 aa                      | 6 aa                |
| TCGA-DD-AACD  | 12              | 1                          | 2 aa                      | 7 aa                |
| TCGA-DD-AAACL | 11              | 3                          | 3 aa                      | 7 aa                |
| TCGA-EP-A2KC  | 6               | 2                          | 3 aa                      | 6 aa                |
| TCGA-G3-A7M9  | 11              | 0                          | 3 aa                      | 6 aa                |
| TCGA-GJ-A6C0  | 8               | 1                          | 3 aa                      | 7 aa                |
| TCGA-KR-A7K0  | 8               | 1                          | 3 aa                      | 6 aa                |
| TCGA-XR-A8TF  | 6               | 1                          | 3 aa                      | 6 aa                |
| TCGA-ZP-A9D4  | 7               | 1                          | 4 aa                      | 7 aa                |

**Table S3.** Alignment of each predicted mutated neoantigen and the homologous pathogen derived antigen from iedb.org. Green letters, indicate identical residues between the two sequences; Red letters, indicate different residues between the two sequences.

| HCC SAMPLE   | Peptide    | p1 | p2 | p3 | p4 | p5 | p6 | p7 | p8 | p9 |
|--------------|------------|----|----|----|----|----|----|----|----|----|
| TCGA-DD-A39X | mut        | L  | L  | A  | V  | S  | S  | H  | W  | L  |
|              | malaria    | L  | L  | A  | V  | S  | S  | I  | L  | L  |
| TCGA-FV-A3R2 | mut        | G  | A  | L  | A  | L  | A  | Q  | V  | L  |
|              | Trip. Cru  | R  | A  | L  | S  | L  | A  | A  | V  | L  |
| TCGA-DD-A3A4 | mut        | M  | A  | F  | S  | D  | L  | T  | S  | M  |
|              | Protein E6 | F  | A  | F  | S  | D  | L  | C  | I  | V  |

|               |             |   |   |   |   |   |   |   |   |   |
|---------------|-------------|---|---|---|---|---|---|---|---|---|
| TCGA-G3-A7M9* | mut         | T | L | Y | D | G | P | N | A | R |
|               | M tuber     | L | L | Y | D | G | S | F | A | V |
| TCGA-GJ-A6C0* | mut         | M | A | P | L | G | G | A | P | L |
|               | HCV         | Y | I | P | L | V | G | A | P | L |
| TCGA-CC-A5UD* | mut         | S | E | I | G | F | G | E | S | L |
|               | TAX HTLV II | H | F | P | G | F | G | Q | S | L |
| TCGA-DD-AACG  | mut         | S | I | I | S | F | D | P | A | V |
|               | HCV         | I | L | D | S | F | D | P | L | V |
| TCGA-DD-AADF  | mut         | R | A | S | G | K | A | Q | P | L |
|               | HCV         | P | F | Y | G | K | A | I | P | L |
| TCGA-DD-AADM  | mut         | T | A | E | E | Q | G | A | Q | L |
|               | HCV         | P | Y | I | E | Q | G | M | Q | L |
| TCGA-2Y-A9H1* | mut         | S | S | V | P | V | S | I | P | K |
|               | dengue      | G | L | F | P | V | S | I | P | I |

\*samples with neoantigens with homology also to cellular self antigens.

**Table S4.** Alignment of each predicted mutated neoantigen and the homologous cellular self antigen from iedb.org. Green letters, indicate identical residues between the two sequences; Red letters, indicate different residues between the two sequences.

| HCC SAMPLE    | Peptide | p1 | p2 | p3 | p4 | p5 | p6 | p7 | p8 | p9 |
|---------------|---------|----|----|----|----|----|----|----|----|----|
| TCGA-2Y-A9H1* | mut     | S  | S  | A  | S  | V  | P  | P  | N  | K  |
|               | self    | M  | S  | A  | S  | V  | H  | P  | N  | K  |
| TCGA-4R-AA8I  | mut     | G  | E  | L  | H  | A  | H  | T  | Q  | A  |
|               | self    | G  | E  | L  | E  | A  | E  | R  | Q  | A  |
| TCGA-BC-A10W  | mut     | R  | R  | T  | E  | V  | A  | H  | A  | L  |
|               | self    | R  | R  | V  | E  | I  | A  | H  | A  | L  |
| TCGA-CC-5258  | mut     | F  | L  | H  | S  | K  | G  | L  | M  | Y  |
|               | self    | F  | L  | D  | S  | K  | G  | L  | E  | Y  |
| TCGA-CC-5264  | mut     | F  | S  | S  | P  | T  | G  | N  | H  | V  |
|               | self    | Y  | S  | Y  | P  | T  | G  | N  | H  | T  |
| TCGA-CC-A5UD* | mut     | N  | E  | V  | I  | K  | L  | Q  | Q  | L  |
|               | self    | N  | E  | V  | I  | G  | I  | R  | Q  | L  |
| TCGA-CC-A8HV  | mut     | S  | L  | L  | T  | L  | Y  | L  | D  | Y  |
|               | self    | R  | M  | L  | T  | L  | W  | L  | D  | Y  |
| TCGA-DD-A116  | mut     | S  | E  | V  | E  | L  | F  | R  | S  | F  |
|               | self    | S  | E  | I  | E  | L  | F  | R  | V  | F  |
| TCGA-DD-AACC  | mut     | L  | A  | R  | E  | R  | R  | A  | V  | L  |
|               | self    | L  | A  | P  | E  | R  | R  | S  | T  | L  |
| TCGA-DD-AACD  | mut     | A  | V  | L  | Q  | S  | G  | A  | P  | I  |
|               | self    | K  | V  | L  | D  | S  | G  | A  | P  | I  |
| TCGA-DD-AACL  | mut     | A  | A  | F  | I  | I  | T  | S  | D  | R  |
|               | self    | A  | A  | F  | I  | I  | G  | S  | G  | R  |
| TCGA-EP-A2KC  | mut     | E  | L  | V  | D  | R  | A  | G  | R  | R  |
|               | self    | Q  | L  | V  | D  | R  | Q  | N  | R  | R  |
| TCGA-G3-A7M9* | mut     | Y  | L  | K  | P  | P  | N  | L  | L  | L  |
|               | self    | Y  | L  | R  | P  | P  | N  | T  | S  | L  |
| TCGA-GJ-A6C0* | mut     | Q  | R  | F  | L  | F  | P  | P  | G  | I  |
|               | self    | N  | R  | F  | L  | F  | P  | E  | G  | I  |
| TCGA-KR-A7K0  | mut     | V  | S  | I  | L  | G  | D  | T  | L  | L  |
|               | self    | V  | S  | I  | L  | G  | D  | E  | V  | F  |
| TCGA-XR-A8TF  | mut     | E  | E  | A  | A  | S  | S  | L  | K  | Y  |
|               | self    | R  | E  | A  | A  | S  | R  | L  | K  | W  |
| TCGA-ZP-A9D4  | mut     | K  | V  | T  | S  | S  | D  | T  | S  | L  |
|               | self    | K  | V  | I  | S  | S  | N  | T  | S  | L  |

\*samples with neoantigens with homology also to cellular pathogen-derived antigens.

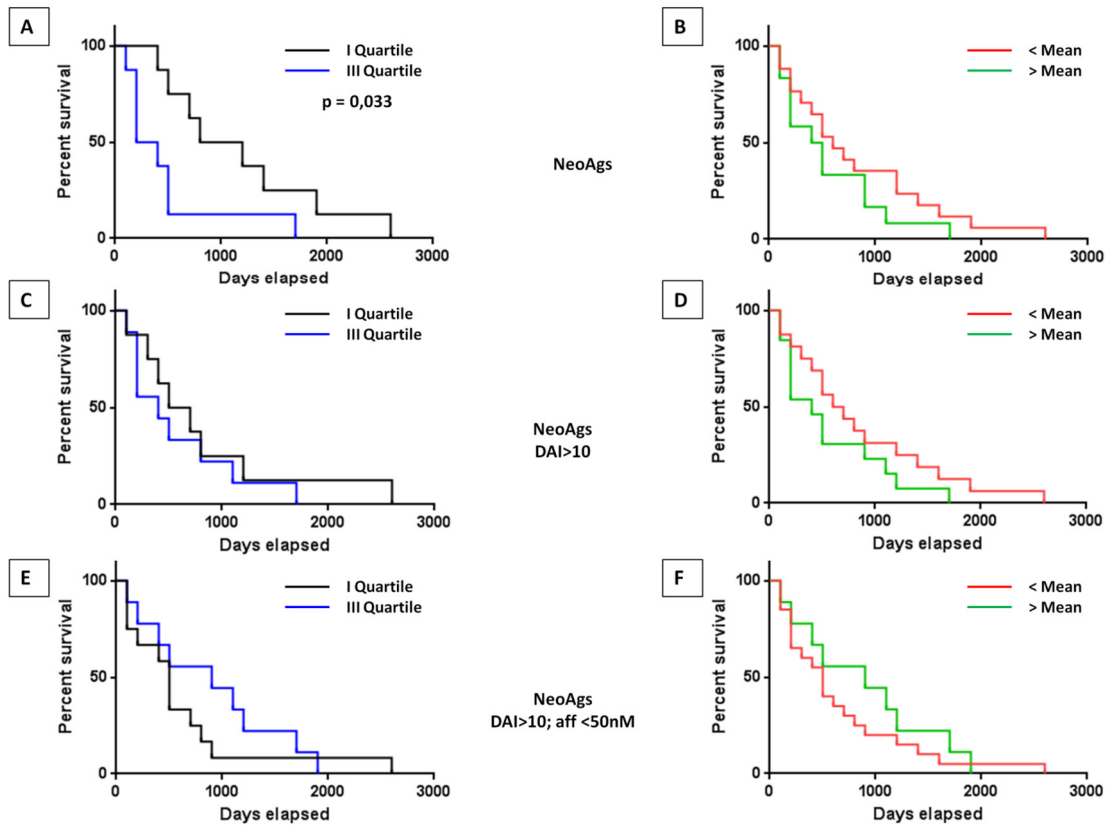

Figure S1. Neoantigens and survival.

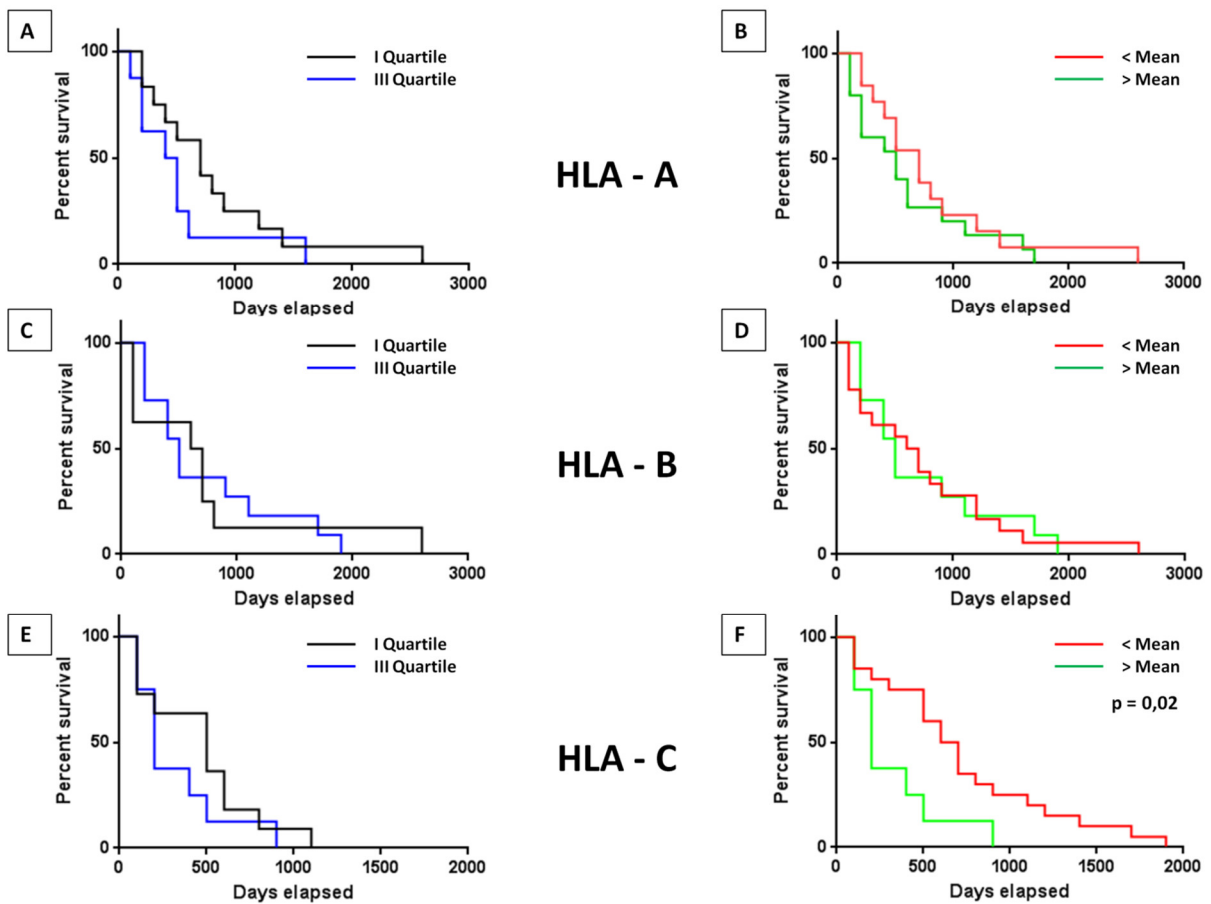

Figure S2. HLA-associated neoantigens and survival.

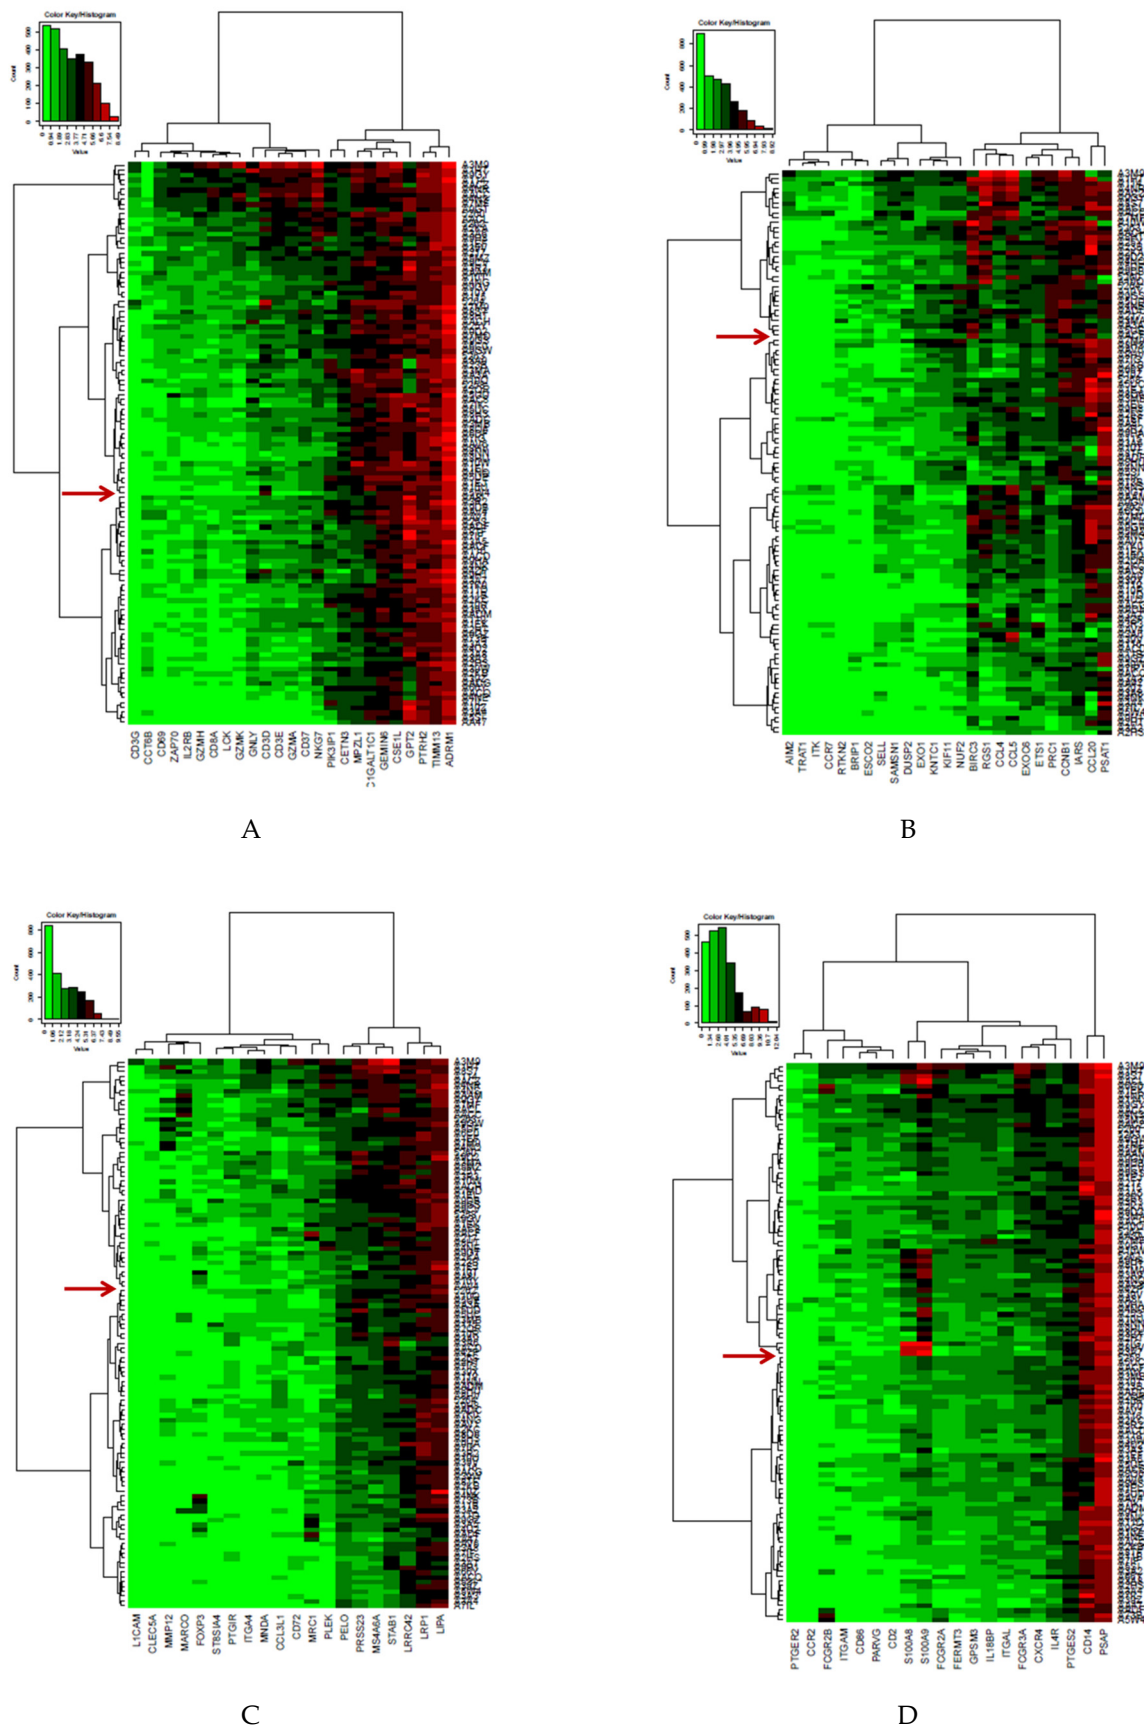

**Figure S3.** (A) Heat map of gene expression for tumor infiltrating CD8<sup>+</sup> T cells. (B) Heat map of gene expression for tumor infiltrating CD4<sup>+</sup> T cells. (C) Heat map of gene expression for tumor infiltrating Tregs. (D) Heat map of gene expression for tumor infiltrating MDSC.

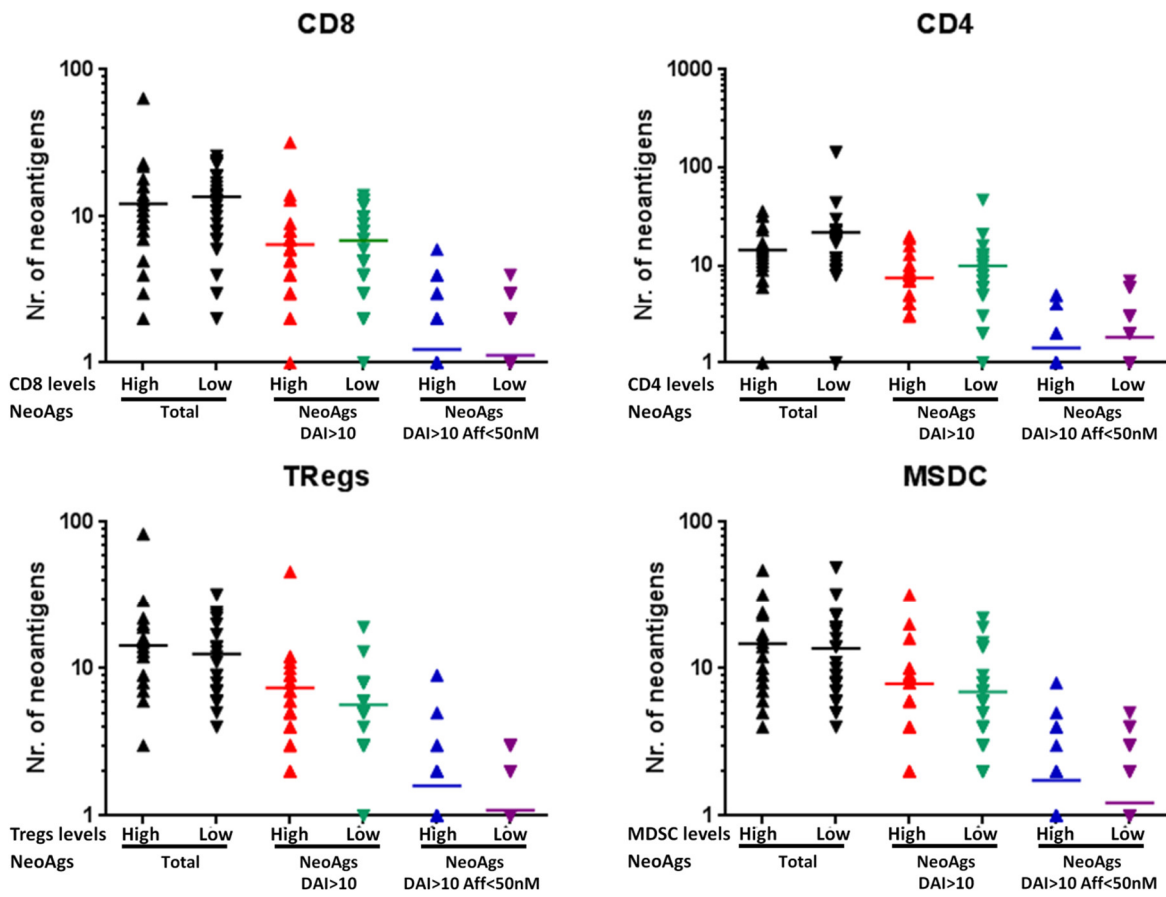

Figure S4. Correlation between neoantigens and tumor infiltrating cells.

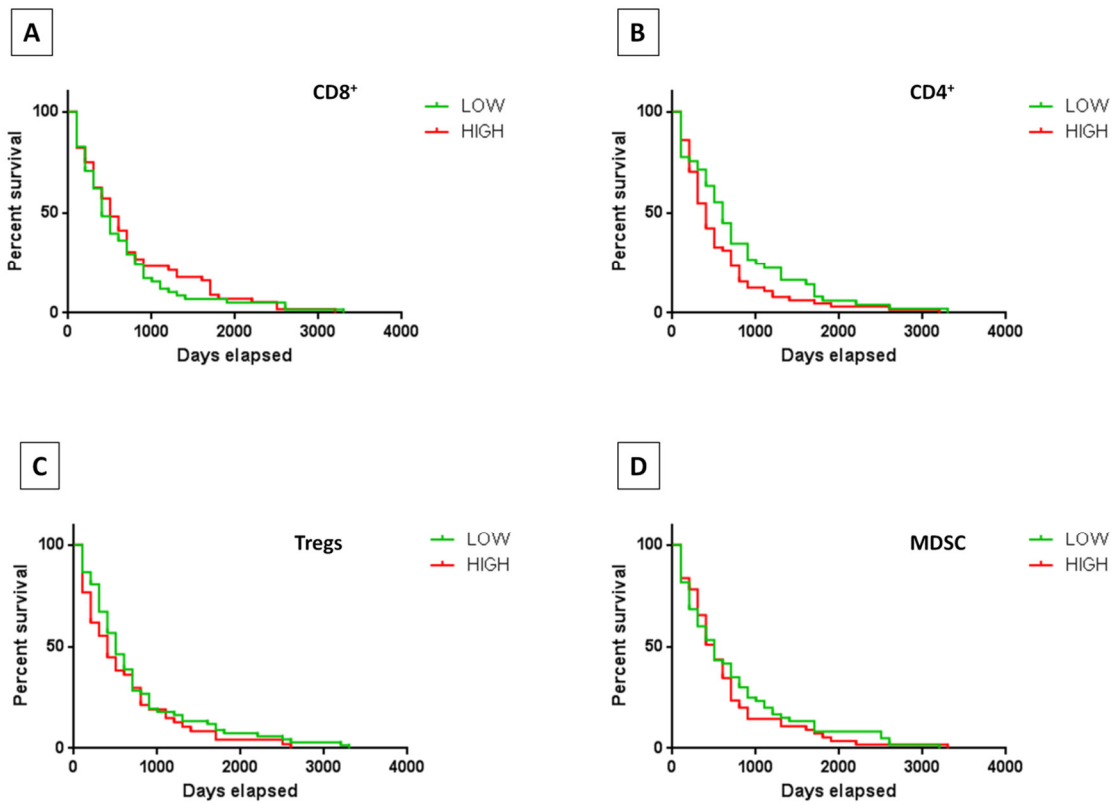

Figure S5. Tumor infiltrating cells and survival.

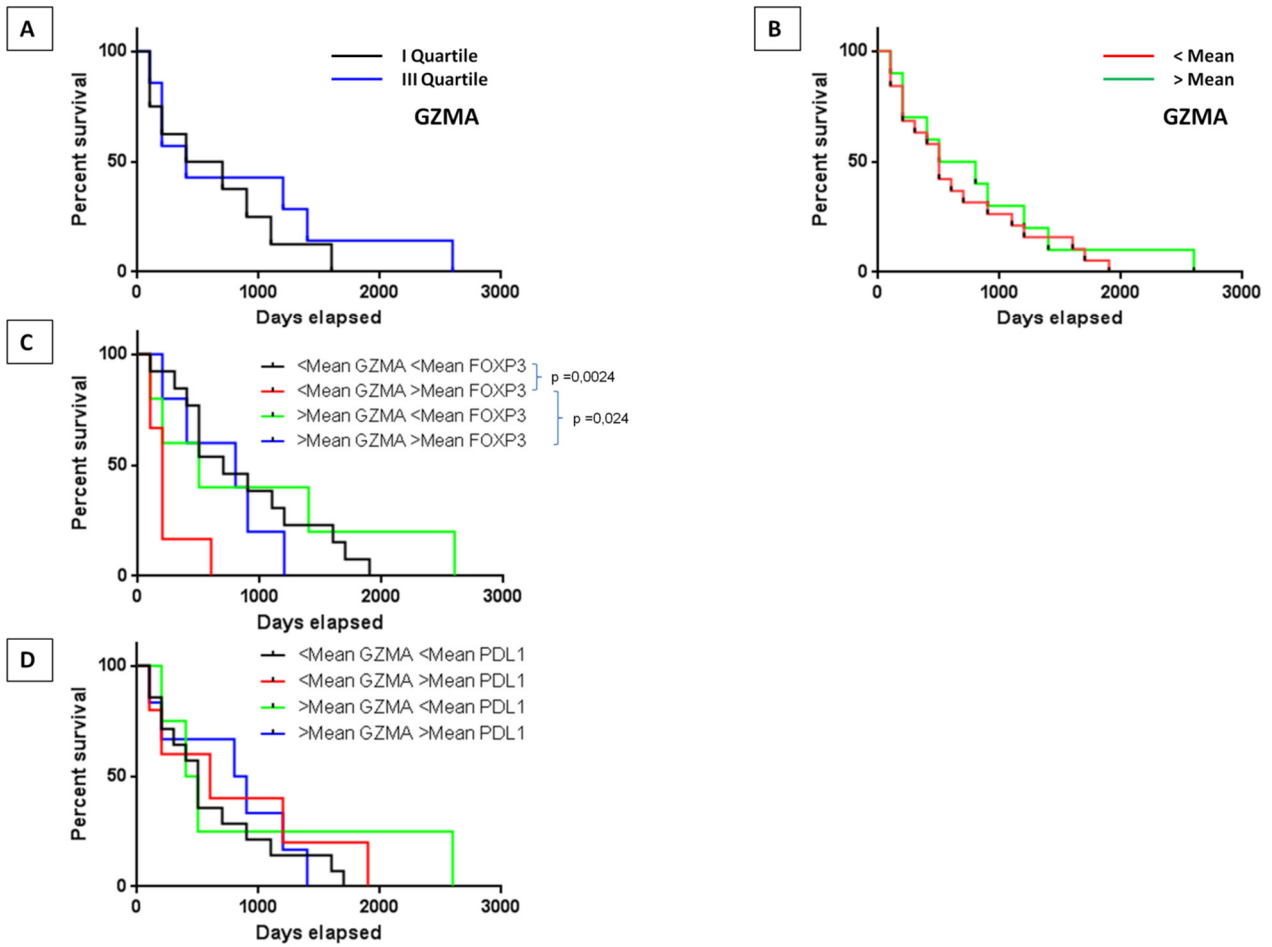

Figure S6. Tumor microenvironment and survival.

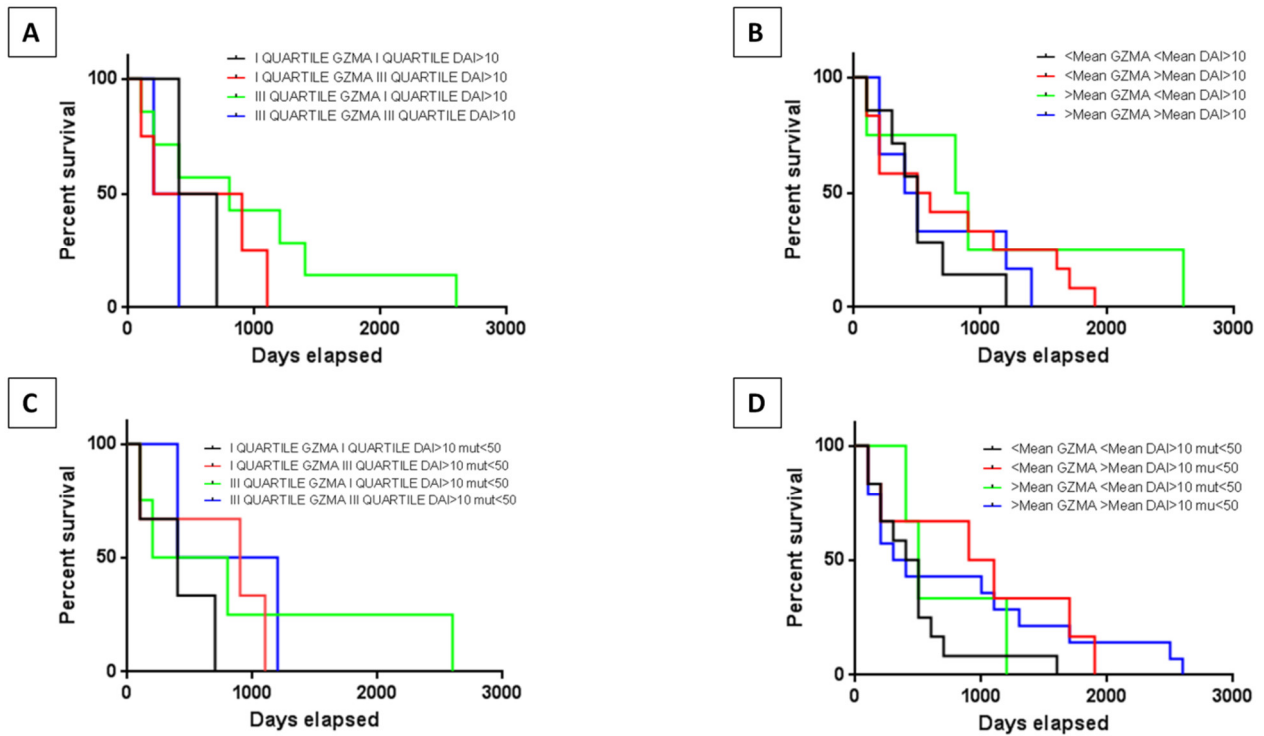

Figure S7. GZMA, neoantigens and survival.

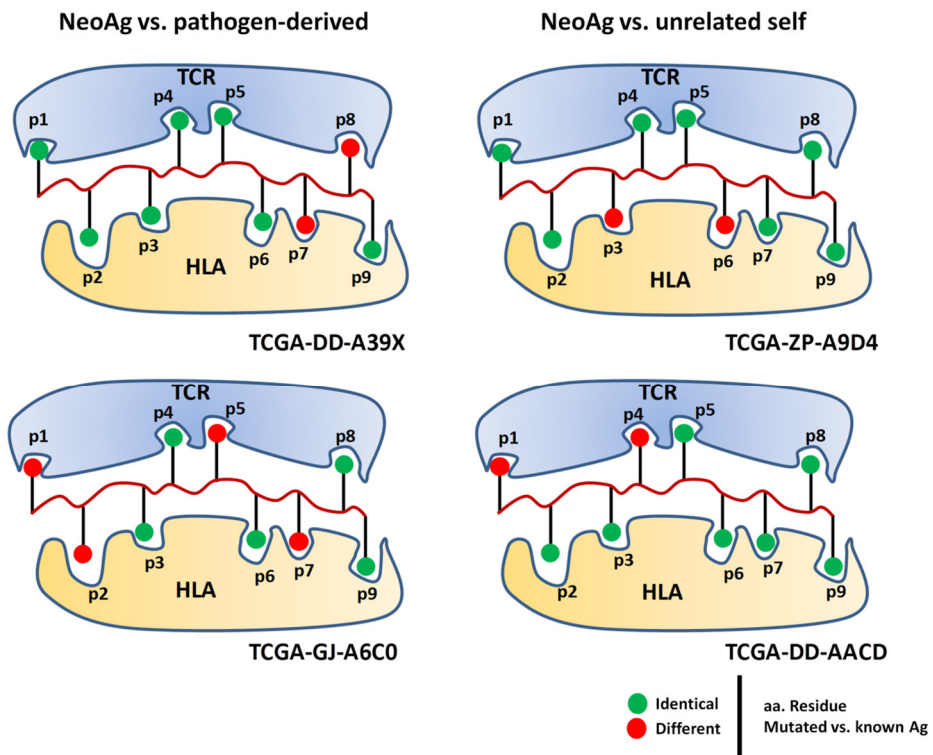

Figure S8. Sequence homology between neoantigens and published epitopes.
